# Supplementary material
Source: HighWire-hosted journal article supplement (https://cmaj.ca/highwire/filestream/58829/field_highwire_adjunct_files/0/peptide-min-1-at.pdf)
Supplement: peptide-min-1-at.pdf [file peptide-min-1-at.pdf]

**Appendix 1: Mortality estimates across the quartiles of the serum C-peptide levels and either glycated hemoglobin or fasting blood glucose.**

All-cause mortality (C-peptide vs Glycated Hemoglobin)

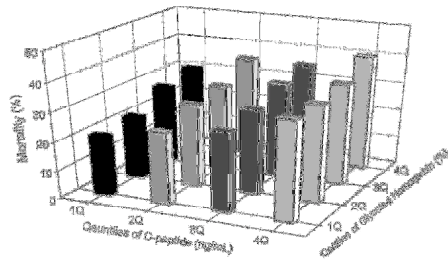

|             |    | Glycated Hemoglobin |        |        |        | p for trend |
|-------------|----|---------------------|--------|--------|--------|-------------|
|             |    | Q1                  | Q2     | Q3     | Q4     |             |
| C-peptide   | Q1 | 20.4                | 22.4   | 25.4   | 25.3   | 0.5327      |
|             | Q2 | 25.3                | 23.5   | 30.7   | 35.3   | 0.7057      |
|             | Q3 | 28.1                | 29.2   | 33.8   | 35.8   | 0.514       |
|             | Q4 | 34.6                | 34.1   | 35.9   | 40.6   | 0.6054      |
| p for trend |    | 0.213               | 0.2029 | 0.0007 | 0.0219 |             |

Cardiovascular disease mortality (C-peptide vs Glycated Hemoglobin) Coronary heart disease mortality (C-peptide vs Glycated Hemoglobin)

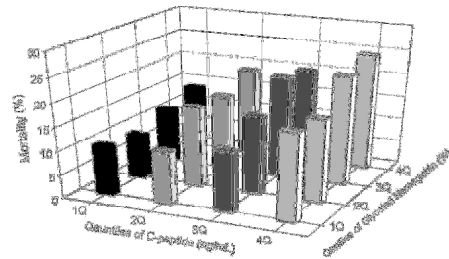

|             |    | Glycated Hemoglobin |        |        |        | p for trend |
|-------------|----|---------------------|--------|--------|--------|-------------|
|             |    | Q1                  | Q2     | Q3     | Q4     |             |
| C-peptide   | Q1 | 10.3                | 9.7    | 12.0   | 14.1   | 0.2408      |
|             | Q2 | 11.2                | 17.0   | 16.3   | 15.1   | 0.6674      |
|             | Q3 | 12.9                | 18.1   | 23.6   | 26.3   | 0.0642      |
|             | Q4 | 18.4                | 17.8   | 23.3   | 24.8   | 0.1445      |
| p for trend |    | 0.1884              | 0.1102 | 0.0091 | 0.0061 |             |

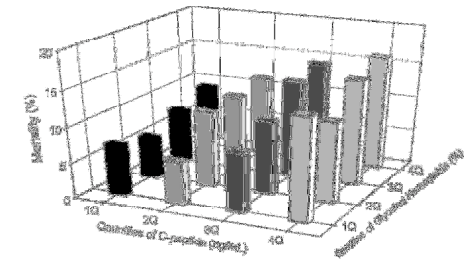

|             |    | Glycated Hemoglobin |        |        |        | p for trend |
|-------------|----|---------------------|--------|--------|--------|-------------|
|             |    | Q1                  | Q2     | Q3     | Q4     |             |
| C-peptide   | Q1 | 7.3                 | 6.1    | 7.3    | 9.4    | 0.2445      |
|             | Q2 | 6.1                 | 10.7   | 10.9   | 11.5   | 0.6909      |
|             | Q3 | 6.3                 | 10.4   | 13.9   | 14.1   | 0.3358      |
|             | Q4 | 14.2                | 11.4   | 15.0   | 18.2   | 0.4167      |
| p for trend |    | 0.1485              | 0.5205 | 0.0005 | 0.0074 |             |

All-cause mortality (C-peptide vs Fasting Blood Glucose)

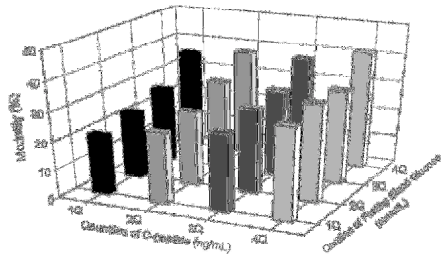

|             |    | Fasting Blood Glucose |        |        |        | p for trend |
|-------------|----|-----------------------|--------|--------|--------|-------------|
|             |    | Q1                    | Q2     | Q3     | Q4     |             |
| C-peptide   | Q1 | 21.37                 | 23.88  | 27.5   | 32.35  | 0.5616      |
|             | Q2 | 24.13                 | 26.74  | 28.88  | 34.39  | 0.6318      |
|             | Q3 | 27.25                 | 21.79  | 31.01  | 33.35  | 0.75        |
|             | Q4 | 35.05                 | 38.89  | 37.28  | 41.87  | 0.2038      |
| p for trend |    | 0.8984                | 0.1126 | 0.0004 | 0.5058 |             |

Cardiovascular disease mortality (C-peptide vs Fasting Blood Glucose) Coronary heart disease mortality (C-peptide vs Fasting Blood Glucose)

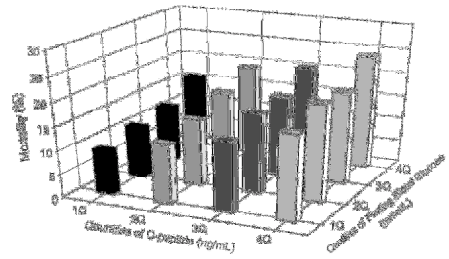

|             |    | Fasting Blood Glucose |        |        |        | p for trend |
|-------------|----|-----------------------|--------|--------|--------|-------------|
|             |    | Q1                    | Q2     | Q3     | Q4     |             |
| C-peptide   | Q1 | 9.7                   | 11.5   | 18.8   | 18.2   | 0.1847      |
|             | Q2 | 12.8                  | 14.3   | 18.8   | 19.8   | 0.3808      |
|             | Q3 | 15.0                  | 17.2   | 17.4   | 20.7   | 0.5475      |
|             | Q4 | 18.0                  | 21.7   | 18.8   | 24.4   | 0.1147      |
| p for trend |    | 0.0061                | 0.0133 | 0.0001 | 0.0005 |             |

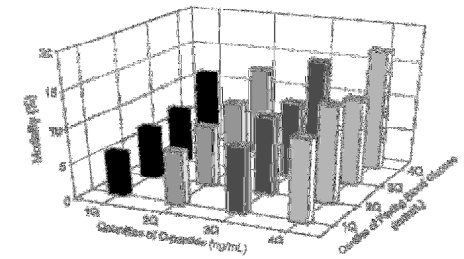

|             |    | Fasting Blood Glucose |        |        |        | p for trend |
|-------------|----|-----------------------|--------|--------|--------|-------------|
|             |    | Q1                    | Q2     | Q3     | Q4     |             |
| C-peptide   | Q1 | 6.3                   | 7.5    | 8.1    | 11.4   | 0.3778      |
|             | Q2 | 7.6                   | 9.8    | 10.0   | 12.9   | 0.6947      |
|             | Q3 | 9.4                   | 11.0   | 11.0   | 14.9   | 0.7485      |
|             | Q4 | 11.7                  | 13.8   | 12.4   | 17.1   | 0.0798      |
| p for trend |    | 0.1388                | 0.1282 | 0.0041 | 0.1182 |             |
